# Supplementary material
Source: PubMed Central journal article supplement (PMC3081251)
Supplement: 10-6425_z7g999111318sf01.pdf [file 10-6425_z7g999111318sf01.pdf]

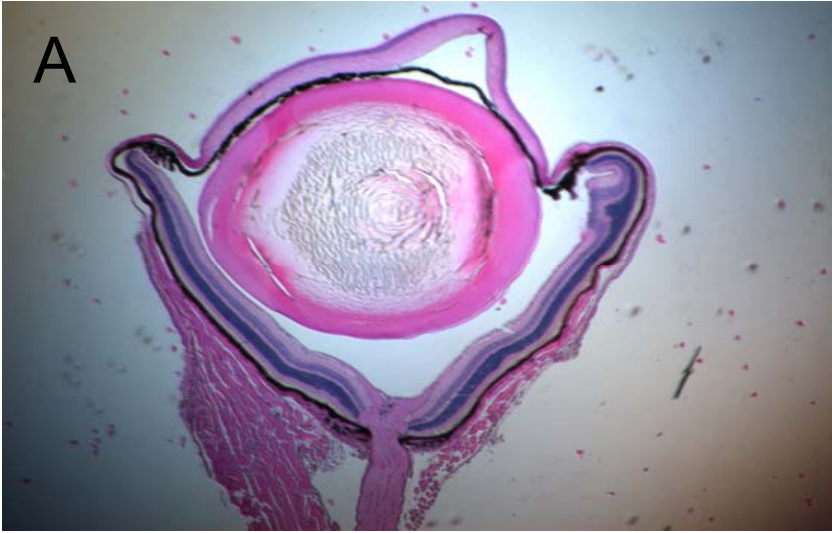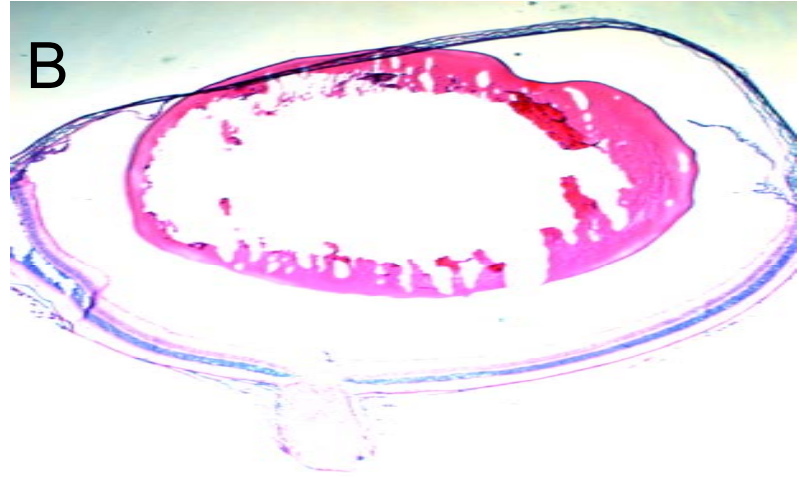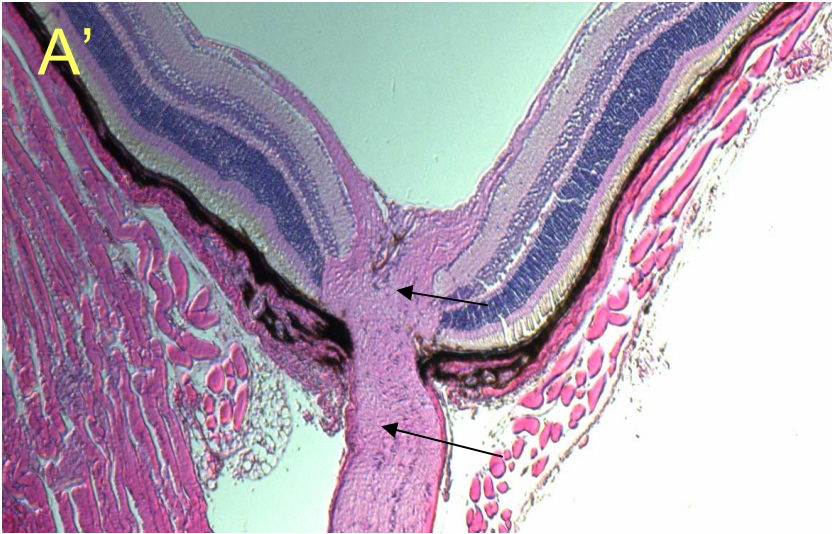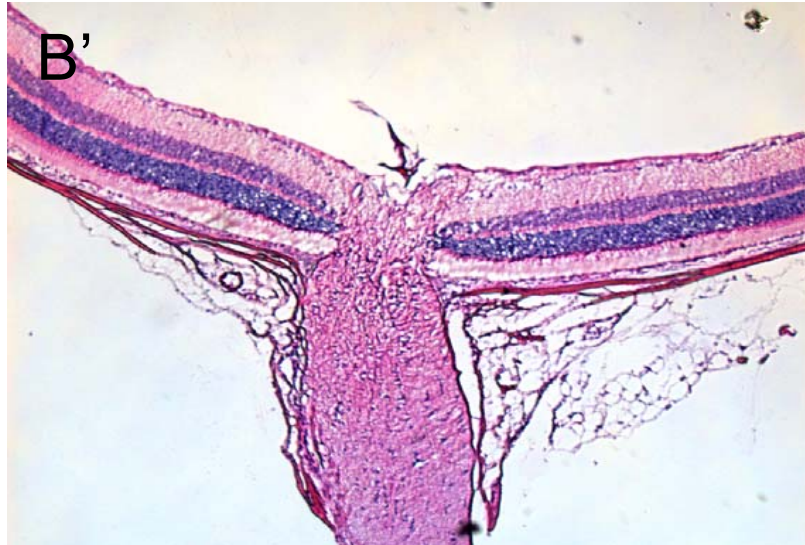

Supplemental Figure S1: The section of the globe showing the optic nerve (indicated by the arrow) in control (A, A') and ND4 mice (B, B') at 8 months of age. The 10 $\mu$ m sections were stained with hematoxylin and eosin.

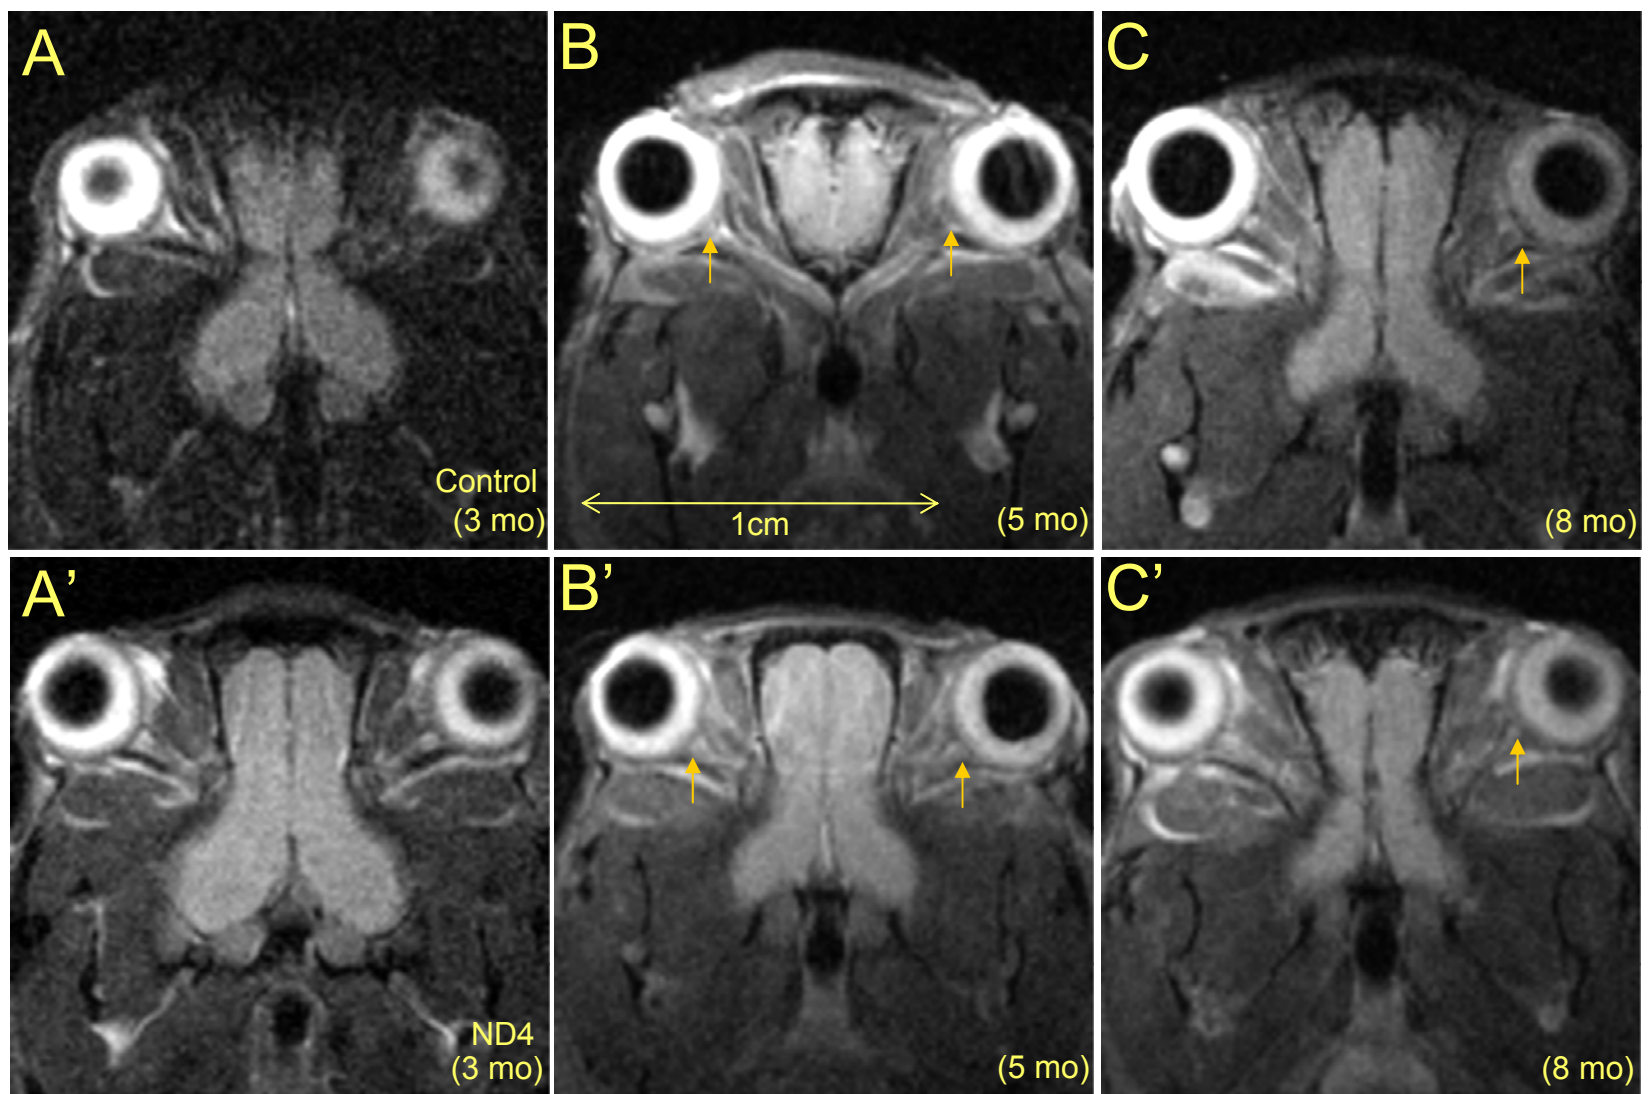

Supplemental Figure S2. T2 RARE MRI optic nerve images of control (A, B, C) and ND4 mice (A', B', C') at ages as indicated. Detailed imaging procedure has been included in the methods section. The intersection/convergence point of optic nerve at globe is indicated by arrows.

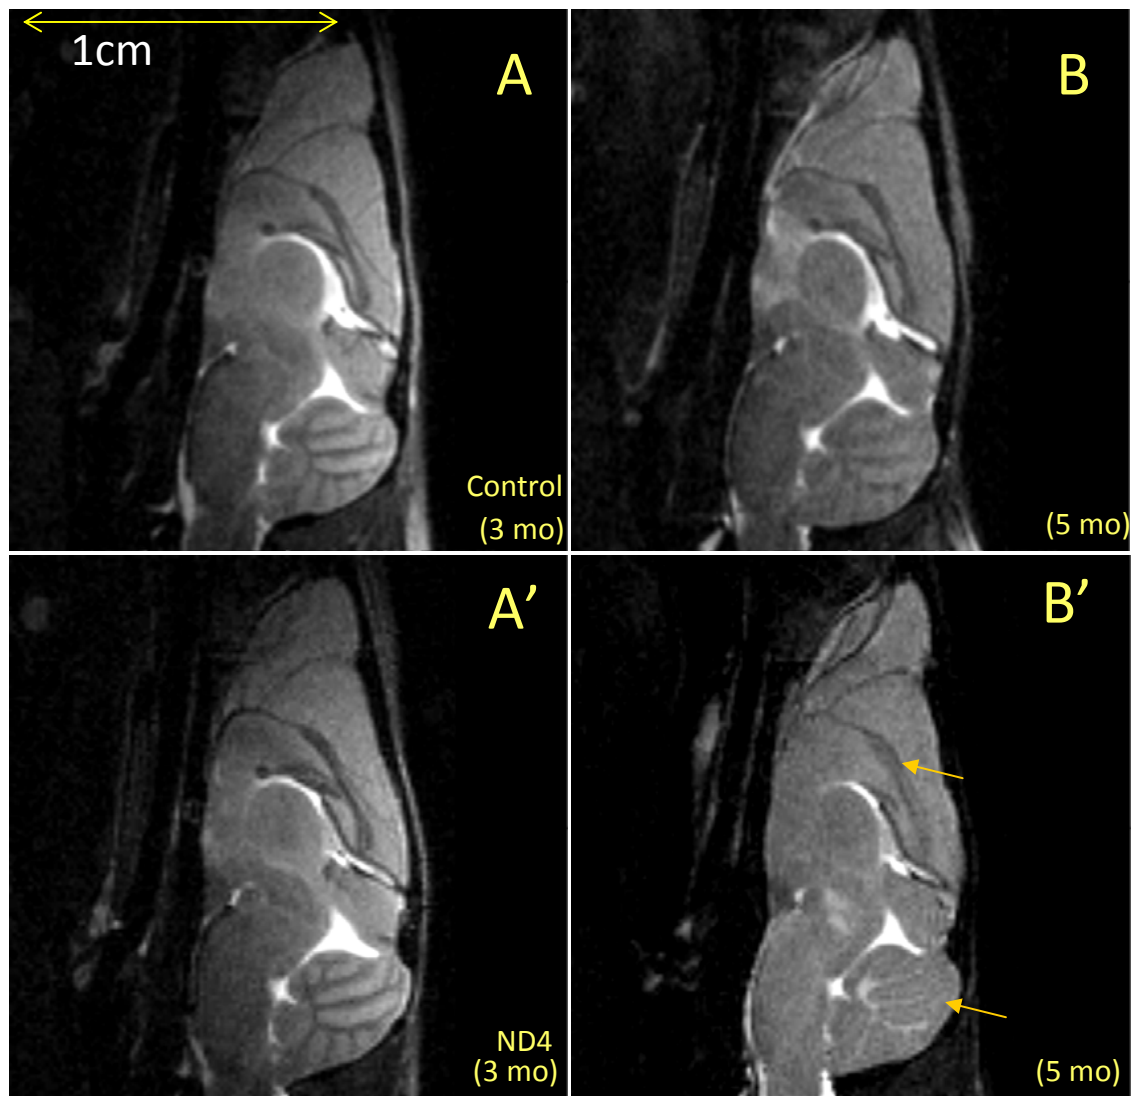

Supplemental Figure S3. Sagittal T2 RARE MRI brain images of control (A, B) and ND4 mice (A', B') at ages as indicated. Detailed imaging procedure has been included in the methods section. The yellow arrows indicate the areas undergoing structural changes and demyelination.
